# Supplementary material for: Enhancement of Desulfurization Capacity with Cu-Based Macro-Porous Sorbents for Hydrogen Production by Gasification of Petroleum Cokes
Source: MDPI journal article supplement (doi:10.3390/app11177775), 2021-08-24

As mentioned in the manuscript, we provided all relaxed neb images in this SI. The figure S1 provides the neb images from  $\text{COS}^*$  to  $\text{CO}^* + \text{S}^*$  step and  $\text{CO}^* + \text{S}^*$  to  $\text{CO}_2^* + \text{S}^*$  step with and without sulfur surface dopant and oxygen vacancies introduced CuO(111) surface. All initial states of  $\text{COS}^*$  include additional oxygen vacancy to provide an active site for a sulfur from COS dissociation step.

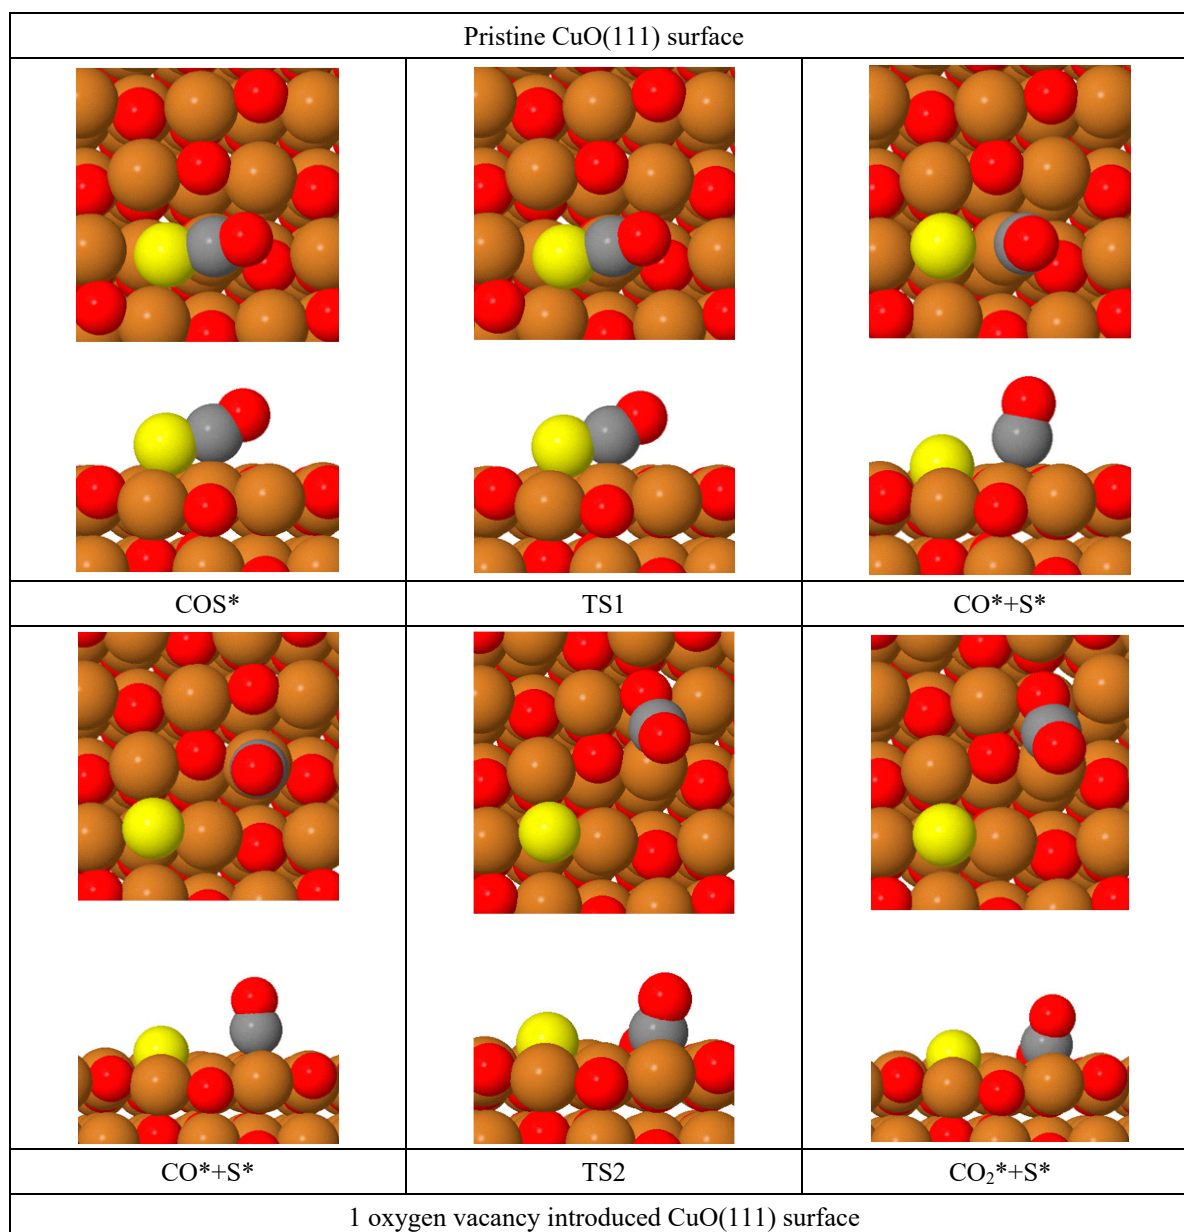

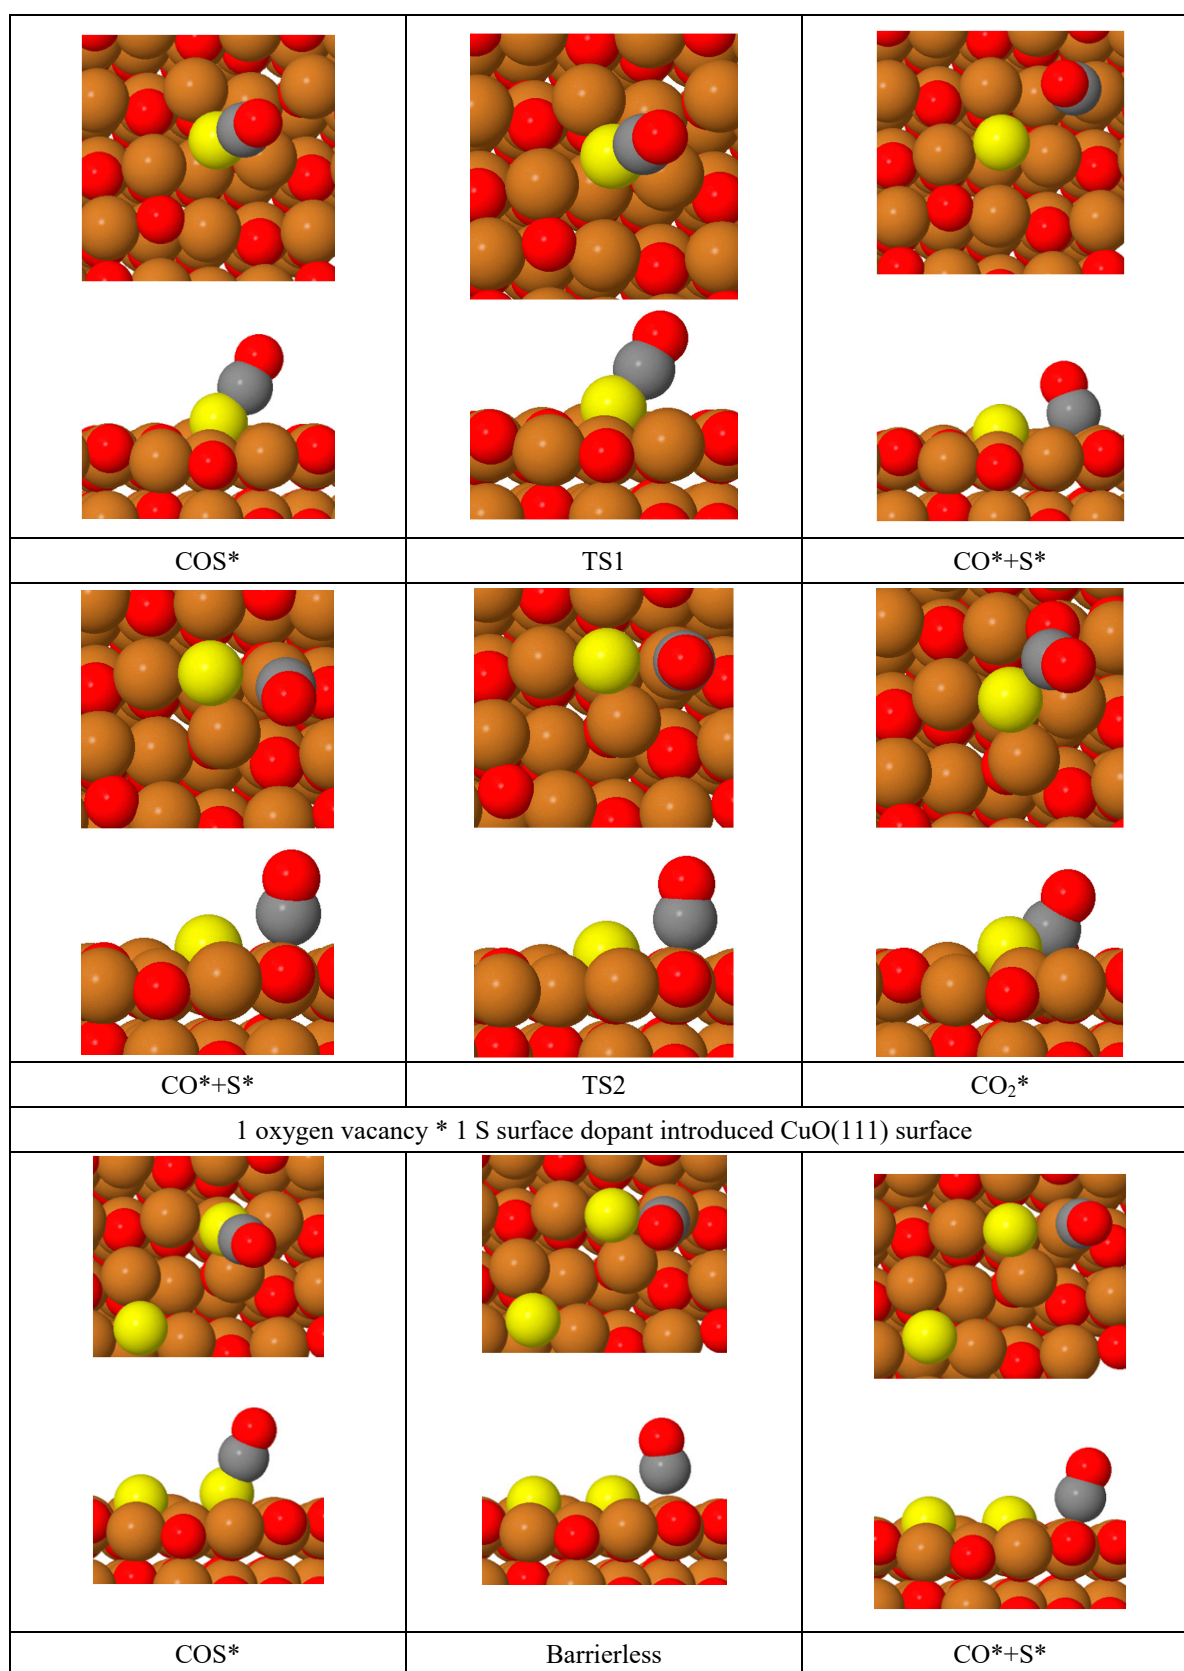

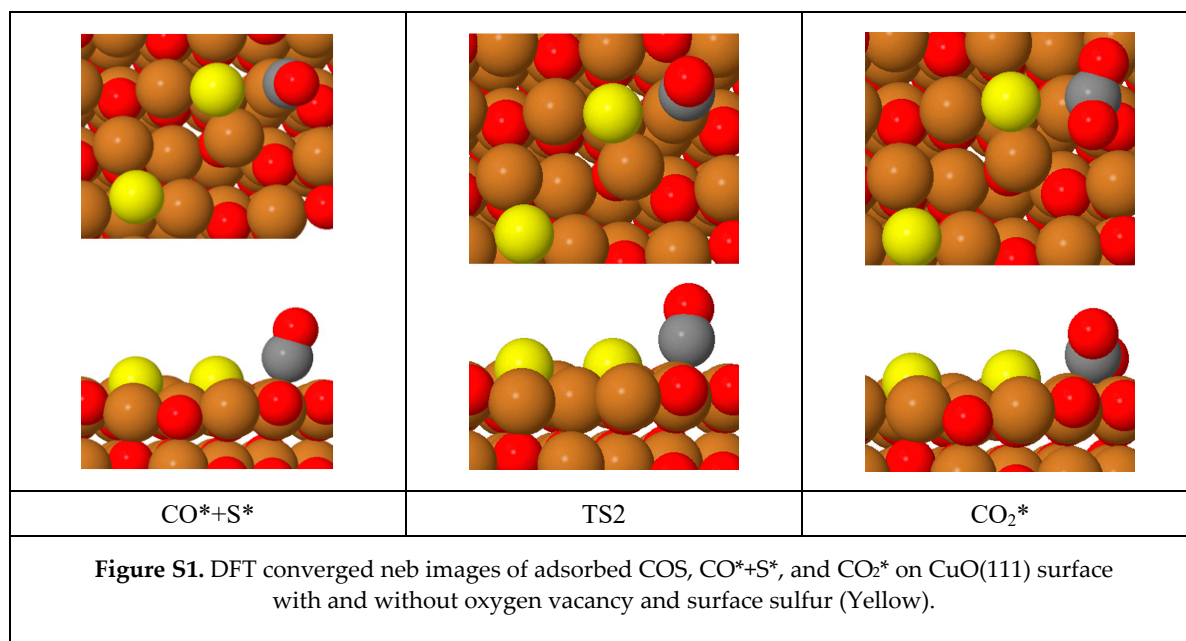

Supplement: s1 [file s1]
