# Supplementary material for: Enhancement of Desulfurization Capacity with Cu-Based Macro-Porous Sorbents for Hydrogen Production by Gasification of Petroleum Cokes
Source: MDPI journal article supplement (doi:10.3390/app11177775), 2021-08-24
Supplement: s1 [file s1]

Archive with 1 entries (1 files):
- applsci-1348223-supplementary.pdf
